# Supplementary material for: Species-Specific Duplication and Adaptive Evolution of a Candidate Sex Pheromone Receptor Gene in Weather Loach
Source: MDPI journal article supplement (doi:10.3390/genes12121845), 2021-11-23
Supplement: s1 [file s1]

**Additional File 1.** Alignment of representative transcripts of orl14-1 of the three loach species

>Ma\_orl14-1a\_TR121279\_B

ACTCATTGTCCCAACCTTGTATCAGGGGAGGGGAGCAAGGAATATTTAAGAGAGGCAC  
CACTTTGTATTAAATCAGTAGGGGAGAGAGATTTTGTAGATGCTGCTATCGCAGACA-----

-----AAAACTGTTG--

TTTTTTATCTTATGTTAAGAATTGCTTTAGTATTTAACTGATAAAAATATAGATGC-  
TTTATTTATTTCAAATCTGCACATGAAATGTAATAACATATTTGATTTGGACAACATTAAT  
GCTTAAATTGAACTTTCACCTAAGGAATGGATTATAGGACATTAACTTTTCTCATAACG  
AATTCTACTTGATTGGATTCACGAGTCTAAACGAGTTTCGTCAGTATCTGTTTCATCCCAT  
TTTAAATCTTGTTTGTGTTCCAATTGTCTGCGAATGGAATTATAATGTTTGTGGTTATAAA  
AGAAAGAAAGTTGCATGCTCCCATGTACATTCTGATTGGGTTCATTGCAGCTCTGGGCT  
TTATACAACCACTATTTCTTCTTCCAAGAATGTTAGTCAGTTTTCTCTTTGGCAAAAATA  
TGATTTATAGAAACGAATGTCTCATTCAAATGTTTTGTATGCATATGGCGGGTTTGTTC  
AGTCAAGTATATTGGTCATGATGGCAGTGGACCGCTTTTTTCGCCATCATTTTCCCCTTGC  
AGTACCATGACTTTGTAACTTTAAAACCTCATTAATATTCTGTTTGTTCCTTTTATCCG  
TAACTTGCTTTATGTTACCTCAATGGTTGGTTTGATTGGGCCACTATATTTTGTAAATCA  
AACGAGATTTACCACTGTGTTTGTGAGCATAACATCTGTTGTTAATATAGCCTGTGGTGAT  
CGTACTAAGAATTACATGGCTGGGATAATCGGTTTCAGTTTAACAACAAGCGACTGTGT  
ATTCATTTTCTGTTCTTATGTTGTTATTTTTGTGATTATGTCTCGTTCTCCTTCAGGGGAG  
TCGTGGCATAAAGCTATCTATACATGTAGCACACATTTAATGGCCATGTTTGTGGCCTTT  
CTCTCTGTTGTGGGTGCATTTGCTGGCTATAGGATTCTACAATACCTAAAGATCTACGT  
GTGATATGTACCTTGGGATATCTTGTCTTCCGAAGTGTTTAACCCAGTAATCTATGGC  
ATGAGAACCAAGGAAATCAGAGTTCAAATTGTTAAATATTTGTCTTCTAATAAGGTT-----

-----  
AATCTGCATTAACCCCTATGATATGGTTTCATTTGTTGTAGGCTATCTTTGTTTTCTGTTC  
CAACTTACTGCGTACATGGATGATGTTTGTAAATTAGTCTGTAATTTGTACATACATGTAA  
TAATACATCAACT-

TTTTGTTAGATTGATACAGTAGACGAATTGGTAGAACAGATATGCATCTATTCATTCTCT  
TTTGTGTGTGATTGTCATATGCGTACATACCTAAAAGCATCCTGAAATTTTGTATGACT  
GTATATGTAACATTTC---

ATTCTGGTATGATTATAAACATGCCTTTACAAATAAAATGCAACAAAGTTGTGTTGGACT  
GTTGTGTT--TCATTCTGTGAAATGTACTGGCTACTCATGTTTACAC-----

-T-----  
----

>Ma\_orl14-1b\_TR121278\_B

ACTCATTGTCCCAACCTTGTATCAGGGGAGGGGAGCAAGGAATATTTAAGAGAGGCAC  
CACTTTGTATTAAATCAGTAGGGGAGAGAGATTTTGTAGATGCTGCTATCGCAGACA-----

-----AAAACTGTTG--

TTTTTTATCTTATGTTAAGAATTGCTTTAGTATTTAACTGATAAAAATATAGATGC-  
TTTATTTATTTCAAATCTGCACATGAAATGTAATAAAATATTTAATTTGGACAACATTAAT  
GCTTAAATTGAACTTTCACCAAAGGAATGGATTATAGGACATTCAACTTTTCTCATAAC  
GAATTCTACTTGATTGGATTCACGGATCTAAACGAGTTTCGGCAGTATCTGTTTCATCCCA

TTTTTAGTCTTGTGTTGTTCCAATTGTTTGCGAATGGAATTATAATGTTTGTGGTTATAA  
AAGAAAGAAAGTTGCATGCTCCCATGTACATTCTGATTGGGTTTCATTGCAGCTCTGGGC  
TTTATAGAACCACTATTTCTTCTTCCAAAAATGTTAGTCAGTTTTCTGTTTGGCAGAAAT  
GTGATTTATAGAAACGAATGTTTCATTCAAATGTTTTGTCTGCATATGGCCGGTTTATTC  
CAGTCAAGTATATTGGTCATGATGGCAGTGGACCGCTTTTTCGCCATCATTTCCTTGG  
CAGTACCATGACTTTGTAAACCTTTAAAACCTCATTAATATTCTGTTTGTCTTTTATCC  
GTAACCTTGCTTTATGTTACCTCAATGGTTGGTTTGAATTGGGCCACTATATTTTGTAAATC  
AAACGAGATTTACCACTGTGTTTGTGAGCATAACATCTGTTGTTAATTTAGCCTGTGGTG  
ATCTTACTAAGAATTACATGGCTGGGATAATCGGTTTCAGCTTAACATCAAGCGACTGT  
GTATTCATTGTCTGTTCTTACATTGTTATTTTTGTGATTATATTCGTTCTCCTTCAGGGGA  
GTCGCGCCAAAAAGCTATCTATACATGTAGCACACATTTAATGGTCTTGGTGGTGGCCT  
TTCTCTCTGTTGTGGGTGCATTTGCTGGCTATAGGATTCCTACAATACCTAGAGATCTAC  
GTGTGCTATGTACCTTGGGATATCTTATTCTTCCGAACCTGTTTTAACCCAGTAATCTATGG  
CATGAGAACCAAGGAAATCAGAGTTCAAATTGTAAATATTTATCTTCTAATAAGGTTA  
ATCTACATCAGTGGTCTTCCCTATTTTTTTCATGAGAGCCCACTGATACAGTAGGTAGA  
ACCCAAAATGAAGAACTGATCTACATTAA-CCCTGAGATATGGTTTAATTTGTTG-----  
TATCTTTGTTCTCTGTTCCAACCTTACTGTGTACATGGATGATGTTTGTAATTAGTCTGTAA  
TTTGTACATACATGTTAATAACATCAACT-  
TTTTGTTAGATTGATACAGTAGACGAATTGGTAGAACAGATATGCATCTATTCATTCTCT  
TTTGTGTGTGATTGTCATATGCGTACATACCTAAAAGCATCCTGAAATTTGTTATGACT  
GTATATGTAACATTC---  
ATTCTGGTATGATTATAAACATGCCTTTACAAATAAAATGCAACAAAGTTGTGTTGGACT  
GTTGTGTT--TCATTCTGTGAAATGTACTGGCTACTCATGTTTACAC-----  
-T-----  
----

>Mb\_or114-1\_TR168214\_C

-----  
AGGGGAGAGAGATTTTGTAGATGCTGCTATTGCAGACATGCTGTAAAAATGACGAACA  
GTTG--  
TTTTTTATCTTATGTTAAGAATTGCTTTAGTATTTAACTGGTCAAAATATAGAGGC-  
TTTATTTATTTCAAATCTGCACATGAAATGTAATAAAATACATT-----  
TAACTTTAATGCTTAAATTGAACTTTCACCTAAGGAATGGATTATAGGACATTCAACTTT  
TCTCATAACGAATTCTACTTGATTGGATTCACGGATCTAAAAGAGTTTCGGCAGTATCTG  
TTCATCCCATTTTATTCTTGTGTTTGTGTTCCAATTGTTTGCGAATGGAATTATAATGTTTG  
TGATTATAAAAGAAAGAAAGTTGCACGCTCCCATGTACATTCTGATTGGGTTTCATTGCA  
GCTTTGGGCTTTATAGAACCACTATTTCTTCTTCCAAGGATGTTAGTCAGTTTTCTGTTT  
GGCAGAAATATGATTTATAGAAACGAATGTCTCATTCAAATGTTTTGTCTGCATATGGCT  
GGTTTGTGTTCCAGTCAAGTATATTGGTCATGATGGCAGTGGACCGATTTTTTGCCATCATT  
TTCCCTTGCAGTACCATGACTATGTAACTTTAAAACCTCATTAATATTTGTTTGTCTC  
TTTATATCCGTAACCTTGCTTTATGTTGCCTCAATGGTTGGTTTGTGTTGGGCCACTATATT  
TTGTAAATCAAACGAGATTTACCACTGTGTTTGTGAGCATAACATCTGTTGTTAATTTAGC  
CTGTGGTGATCTTACTAAGAATTACATGGCTGGTGTAAATCGGTTTCAGCTTAACATCAA  
GCGACTGTGTATTCAATTGTCTGTTCTTACATTGTTATTTTTGTGATTATATTCGTTCTCCT  
TCAGGTGAGTCACGACAAAAAGCTATCTATACATGTAGCACACATTTAATGGTCTTGGT

GGTGGCCTTTCTCTCTGTTGTGGGTGCATTTGCTGGCTATAGGATTCCTACAATACCTAG  
AGATCTACGTGTGCTATGTACCTTGGGATATCTTATTCTTCCGAACTGTTTTAACCCAGT  
CATCTATGGCATGAGAACCAAGGAAATCAGAGTTCAAATTGTAAATATTTGTCTTCTA  
ATAAGGTT-----

AATCTACATTAA-CCCTGTGATATGGTTTCATTTGTTG-----

TATCTTTGTTCTCTGTTCCAACCTTACTGTGTACATGGATGATGTTTGTAATTAGTCTGTAA  
TTTGTACATTCATGTTAATAATACATCAACGATTTTGTTAGATTGATACAGTACATGAATT  
GGTAGAACAGATATGCATCTATTCACTCTCTTTTGTGTGTGATTGTCATATGCATACA----  
TAAAAGCAACCTGAAATTTTGTATGACTGTATATGTAACATTTTTTAATTTTGGTATGAT  
TATAAACATGCCTTTACATATAAAATGCAACAAAGTTGTGTTGGACTGTTGTGCTTATCA  
TTCTGTGAAATGTACTGTCTATTTGTAAAGGAA-----

CAGTATGTAGGATTGTGGCCAAAACCTGGTATTGCAATCACAAAACCTGTGGCTAAAGCT  
GGTACTGCAATCACACAACCTGGTGGCCAATACACAAAATGACAACATAAACATCAGTT  
GAGG

>Pd\_or114-1\_TR205479\_D

-----  
CCACTTTGTATTAAATCAGTAGGGGAGAGAGATTTTGTAGATGCTGCTATTGCAGACAT  
GCTGTAAAAACGTCAAACCTGTTGTTTTTTTTTATCTTATGTTAAGAATTGCTTTAGTATTTA  
ACTGATAAAAATATAGAGGCTTTTATTTATTTCAACTCTGCGCATGAAATGTATTAAAT  
ATTTAATTTGGACAACATTAATGCTTAAATTGAACTCTCACCCAAGGAATGGATTATAGG  
ACATTCAACTTTTCCATAACGAATTCTACTTGATTGGATTACGGATTGAAAGAGTTT  
CGGCAGTATCTGTTTCATCCCATTTTATGCTTGTGTTTCCCAATTGTTTGCGAATGGA  
ATTATAATGTTTGTGATTATAAAAGAAAGAAAGTTGCATGCTCCCATGTACATTCTGATT  
GGGTTTCATTGCGGCTCTGGGCTTTATAGAACCAATATTTCTTCTTCCAAGAATGTTAGTC  
AGTTTTCTGTTTGGCAGAAATATGATTTATAGAAACGAATGTCTCATTCAAATGTTTTGT  
CTGCATATGGCGGGTTTGTTCAGTCAAGTATATTGGTCGGGATGGCAGTGGACCGATT  
TTTTGCCATCATTTTCCCTTGCAGTACCATGAGTATGTAACTTTAAACCTCATTAAT  
ATTCTGTTTGTCTCTTTTATCCGTAACCTGCTTTATGTTGCCTCAATGGTTGGTTGCTT  
GGTCCACTCTATTTTGTAAATCAAACGAGATTTACCACTGTGTTTGTGAACACACATC  
AGTTGTTAATTTAGCCTGTGGTGATCTTACTAAGAATTACGTGGCGGGTGTAAATCGGTTT  
CAGTTTAAACATCAAGCGACTGTGTATTCACTGTCTGTTCTTACATTGTTATTTTGTGATT  
ATATTCGTTCTCCTTCAGGCGAGTCGCGCCAAAAGCTATCTATACATGTAGCACACAT  
TTAATGGTCTTGGTCGTGGCCTTTCTCTCTGTTGTGGGTGCATTTGCTGGCTATAGGATT  
CCTTCAATACCTAGAGATCTACGTGTGCTATGTACCTTGGGATATCTTATTCTTCCGAACT  
GTTTTAACCCAGTAATCTATGGCATGAGAACCAAAGAAATCAGAGTTCAAATTGTAA  
TATTTATCTTCTAATAAGGTT-----

-AATCTACATTAA-CCTTGAGATATGGTTTCATTTGTTG-----

TATCTTTGTTTCTGTTCCAACCTTACTGTGTACATGGATGATGTTTGTAATTAGTCTGTAA  
TTTGTACATACATGTTAATAATACATCAAC--

TTTTGTTAGATCGCTACAGTACATGAATTGGTAGAACAGATATGCATGTATTCACTCTCT  
TTGTGTGTGATTGTCATATGCATACATACCTATAAGCAACCTGAAATTTTCTTAAGACTG  
TATATGTAACATTTA---

ATTCTGGTATGATTATAAACATGCCTTTACAAATAAAATGCACCAAAGTTGTGTTGGACT  
GTTGTGTTTATCATTCTGTGAAATGTACTGGCTACTCATGTTTACACTTCATTCATTTTCT

CCAATGACAAACATTTGTCCTATTTGTTGAGTGATCCTATGTTTTTCCTAGTGTATGAAA  
ATGTATTCGGTGACTGCATTTGCCTTTTGCACCTTATCAATCTTTTACAATTAAATGACTC  
A-----

**Additional File 2.** Allele sequences of orl14-1 of the three loach species

>YYAB1\_orl14-1a

ATGGATTATAGGACATTAACTTTTCTCATAACGAATTCTACTTGATTGGATTACAGAGT  
CTAAACGAGTTTCGTCAGTATCTGTTTCATCCCATTTTAAATCTTGTTTGTGTTCCAATTGT  
CTGCGAATGGAATTATAATGTTTGTGGTTATAAAAGAAAGAAAGTTGCATGCTCCCATG  
TACATTCTGATTGGGTTTCATTGCAGCTCTGGGCTTTATACAACCACTATTTCTTCTTCCA  
AGAATGTTAGTCAGTTTTCTCTTTGGCAAAAATATGATTTATAGAAACGAATGTCTCATT  
CAAATGTTTTGTATGCATATGGCGGGTTTGTTCAGTCAAGTATATTGGTCATGATGGCA  
GTGGACCGCTTTTTTCGCCATCATTTTCCCCTTGCAGTACCATGACTTTGTAACCTTTAAA  
ACCTCATTAATATTCTGTTTGTCTTTTTATCCGTAACCTTGCTTTATGTTACCTCAATGGT  
TGGTTTGATTGGGCCACTATATTTTGTAAATCAAACGAGATTACCCTGTGTTTGTGA  
GCATACATCTGTTGTTAATATAGCCTGTGGTGATCGTACTAAGAATTACATGGCTGGGAT  
AATCGGTTTCAGTTTAACAACAAGCGACTGTGTATTCATTTTCTGTTCTTATGTTGTTAT  
TTTTGTGATTATGTCTCGTTCTCCTTCAGGGGAGTCGTGGCATAAAGCTATCTATACATG  
TAGCACACATTTAATGGCCATGTTTGTGGCCTTTCTCTCTGTTGTGGGTGCATTTGCTGG  
CTATAGGATTTCTACAATACCTAAAGATCTACGTGTGATATGTACCTTGGGATATCTTGTT  
CTTCCGAACGTGTTTAAACCCAGTAATCTATGGCATGAGAACCAAGGAAATCAGAGTTCA  
AATTGTTAAATATTTGTCTTCTAATAAGGTTAATCTGCATTAA

>YYAB1\_orl14-1b\_allele\_A

ATGGATTATAGGACATTCAACTTTTCTCATAACGAATTCTACTTGATTGGATTACGGAT  
CTAAACGAGTTTCGGCAGTATCTGTTTCATCCCATTTTATAGTCTTGTTTGTGTTCCAATTG  
TTTGCGAATGGAATTATAATGTTTGTGATTATAAAAGAAAGAAAGTTGCATGCTCCCAT  
GTACATTCTGATTGGGTTTCATTGCAGCTCTGGGCTTTATAGAACCACTATTTCTTCTTCC  
AAGAATGTTAGTCAGTTTTCTGTTTGGCAGAAATGTGATTTATAGAAACGAATGTTTCA  
TTCAAATGTTTTGTCTGCATATGGCCGGTTTATTCCAGTCAAGTATATTGGTCATGATGG  
CAGTGGACCGATTTTTTGCCATCATTTTCCCCTTGCAGTACCATGACTATGTAACTTTA  
AAACCTCATTAATATTCTGTTTGTCTCTTTTTATCCGTAACCTTGCTTTATGTTGCCTCAAT  
GGTTGGTTTGCTGGGGCCACTATATTTTGTAAATCAAACGAGATTACCCTGTGTTTG  
TGAGCATAACATCTGTTGTTAATTTAGCCTGTGGTGATCTTACTAAGAATTACATGGCTGG  
GATAATCGGTTTCAGCTTAACATCAAGCGACTGTGTATTCATTGTCTGTTCTTACATTGT  
TATTTTTGTGATTATATTCGTTCTCCTTCAGGGGAGTCGCGCCAAAAGCTATCTATAC  
ATGTAGCACACATTTAATGGTCTTGGTGGTGGCCTTTCTCTCTGTTGTGGGTGCATTTGC  
TGGCTATAGGATTCCTACAATACCTAGAGATCTACGTGTGCTATGTACCTTGGGATATCT  
TATTCTTCCGAACGTGTTTAAACCCAGTAATCTATGGCATGAGAACCAAGGAAATCAGAG  
TTCAAATTGTAAATATTTATCTTCTAATAAGGTTAATCTACATCAGTGGTCTTCCCTATT  
TTTTTCATGAGAGCCACACTGATACAGTAGGTAGAACCCAAAATGAAGAACACTGATC  
TACATTAA

>YYAB1\_orl14-1b\_allele\_B

ATGGATTATAGGACATTCAACTTTTCTCATAACGAATTCTACTTGATTGGATTACGGAT  
CTAAACGAGTTTCGGCAGTATCTGTTTCATCCCATTTTATAGTCTTGTTTGTGTTCCAATTG  
TTTGCGAATGGAATTATAATGTTTGTGATTATAAAAGAAAGAAAGTTGCATGCTCCCAT  
GTACATTCTGATTGGGTTTCATTGCAGCTCTGGGCTTTATAGAACCACTATTTCTTCTTCC

AAAAATGTTAGTCAGTTTTCTGTTTGGCAGAAATGTGATTTATAGAAACGAATGTTTCA  
TTCAAATGTTTTGTCTGCATATGGCCGGTTTATTCCAGTCAAGTATATTGGTCATGATGG  
CAGTGGACCGATTTTTTCGCCATCATTTTCCCCTTGCAGTACCATGACTATGTAAACTTTA  
AAACCTCATTAATATTCTGTTTGTCTCTTTTTATCCGTAACTTGCTTTATGTTGCCTCAAT  
GGTTGGTTTGCTGGGGCCACTATATTTTTGTAAATCAAACGAGATTACCCTGTGTTTG  
TGAGCATACATCTGTTGTTAATTTAGCCTGTGGTGATCTTACTAAGAATTACATGGCTGG  
GATAATCGGTTTCAGCTTAACATCAAGCGACTGTGTATTCATTGTCTGTTCTTACATTGT  
TATTTTTGTGATTATATTTTCGTTCTCCTTCAGGGGAGTCGCGCCAAAAAGCTATCTATAC  
ATGTAGCACACATTTAATGGTCTTGGTTGTGGCCTTTCTCTCTGTTGTAGGTGCATTTGC  
TGGCTATAGGATTCTTACAATACCTAGAGATCTACGTGTGCTATGTACCTGGGATATCT  
TATTCTCCGAAGTGTTTAACCCAGTAATCTATGGCATGAGAACCAAGGAAATCAGAG  
TTCAAATTGTAAATATTTATCTTCTAATAAGGTTAATCTACATCAGTGGTCTTCCCTATT  
TTTTTCATGAGAGCCACACTGATACAGTAGGTAGAACCCAAAATGAAGAACACTGATC  
TACATTAA

>YYAB2\_or114-1a

ATGGATTATAGGACATTAAACTTTTCTCATAACGAATTCTACTTGATTGGATTACGAGT  
CTAAACGAGTTTCGTCAGTATCTGTTTCATCCCATTTTAAATCTTGTTTGTGTTCCAATTGT  
CTGCGAATGGAATTATAATGTTTGTGGTTATAAAAGAAAGAAAGTTGCATGCTCCCATG  
TACATTCTGATTGGGTTCATTGCAGCTCTGGGCTTTATACAACCACTATTTCTTCTTCCA  
AGAATGTTAGTCAGTTTTCTCTTTGGCAAAAATATGATTTATAGAAACGAATGTCTCATT  
CAAATGTTTTGTATGCATATGGCGGGTTTGTTCAGTCAAGTATATTGGTCATGATGGCA  
GTGGACCGCTTTTTTCGCCATCATTTTCCCCTTGCAGTACCATGACTTTGTAACCTTTAAA  
ACCTCATTAATATTCTGTTTGTCTTTTTATCCGTAACTTGCTTTATGTTACCTCAATGGT  
TGGTTTGATTGGGCCACTATATTTTTGTAAATCAAACGAGATTACCCTGTGTTTGTGA  
GCATACATCTGTTGTTAATATAGCCTGTGGTGATCGTACTAAGAATTACATGGCTGGGAT  
AATCGGTTTCAGTTTAACAACAAGCGACTGTGTATTCATTTTCTGTTCTTATGTTGTTAT  
TTTTGTGATTATGTCTCGTTCTCCTTCAGGGGAGTCGTGGCATAAAGCTATCTATACATG  
TAGCACACATTTAATGGCCATGTTTGTGGCCTTTCTCTCTGTTGTGGGTGCATTTGCTGG  
CTATAGGATTTCTACAATACCTAAAGATCTACGTGTGATATGTACCTGGGATATCTTGTT  
CTTCCGAAGTGTTTAACCCAGTAATCTATGGCATGAGAACCAAGGAAATCAGAGTTCA  
AATTGTTAAATATTTGTCTTCTAATAAGGTTAATCTGCATTAA

>YYAB2\_or114-1b

ATGGATTATAGGACATTCAACTTTTCTCATAACGAATTCTACTTGATTGGATTACGGAT  
CTAAACGAGTTTCGGCAGTATCTGTTTCATCCCATTTTATAGTCTTGTTTGTGTTCCAATTG  
TTTGCGAATGGAATTATAATGTTTGTGATTATAAAAGAAAGAAAGTTGCATGCTCCCAT  
GTACATTCTGATTGGGTTCATTGCAGCTCTGGGCTTTATAGAACCACTATTTCTTCTTCC  
AAGAATGTTAGTCAGTTTTCTGTTTGGCAGAAATGTGATTTATAGAAACGAATGTTTCA  
TTCAAATGTTTTGTCTGCATATGGCCGGTTTATTCCAGTCAAGTATATTGGTCATGATGG  
CAGTGGACCGATTTTTTGCCATCATTTTCCCCTTGCAGTACCATGACTATGTAAACTTTA  
AAACCTCATTAATATTCTGTTTGTCTCTTTTTATCCGTAACTTGCTTTATGTTGCCTCAAT  
GGTTGGTTTGCTGGGGCCACTATATTTTTGTAAATCAAACGAGATTACCCTGTGTTTG  
TGAGCATACATCTGTTGTTAATTTAGCCTGTGGTGATCTTACTAAGAATTACATGGCTGG  
GATAATCGGTTTCAGCTTAACATCAAGCGACTGTGTATTCATTGTCTGTTCTTACATTGT  
TATTTTTGTGATTATATTTTCGTTCTCCTTCAGGGGAGTCGCGCCAAAAAGCTATCTATAC

ATGTAGCACACATTTAATGGTCTTGGTGGTGGCCTTTCTCTCTGTTGTGGGTGCATTTGC  
TGGCTATAGGATTCTACAATACCTAGAGATCTACGTGTGCTATGTACCTTGGGATATCT  
TATTCTTCCGAAGTGTTTAACCCAGTAATCTATGGCATGAGAACCAAGGAAATCAGAG  
TTCAAATTGTAAATATTTATCTTCTAATAAGGTAAATCTACATCAGTGGTCTTCCCTATT  
TTTTTCATGAGAGCCACACTGATACAGTAGGTAGAACCCAAAATGAAGAACACTGATC  
TACATTAA

>ZS2\_or114-1a\_allele\_A

ATGGATTATAGGACATTAACTTTTCTCATAACGAATTCTACTTGATTGGATTACAGAGT  
CTAAACGAGTTTCGTCAGTATCTGTTTCATCCCATTTTAAATCTTGTTTGTGTTCGAATTGT  
CTGCGAATGGAATTATAATGTTTGTGGTTATAAAAGAAAGAAAGTTGCATGCTCCCATG  
TACATTCTGATTGGGTTCATTGCAGCTCTGGGCTTTATACAACCACTATTTCTTCTTCCA  
AGAATGTTAGTCAGTTTTCTCTTTGGCAAAAATATGATTTATAGAAACGAATGTCTCATT  
CAAATGTTTTGTATGCATATGGCGGGTTTGTTCAGTCAAGTATATTGGTCATGATGGCA  
GTGGACCGCTTTTTTCGCCATCATTTTCCCCTTGCAGTACCATGACTTTGTAACCTTTAAA  
ACCTCATTAATATTCTGTTTGTTCCTTTTATCCGTAACCTTGCTTTATGTTACCTCAATGGT  
TGGTTTGTATTGGGCCACTATATTTTGTAAATCAAACGAGATTTACCACTGTGTTTGTGA  
GCATACATCTGTTGTTAATATAGCCTGTGGTGATCGTACTAAGAATTACATGGCTGGGAT  
AATCGGTTTCAGTTTAAACAACAAGCGACTGTGTATTCATTTTCTGTTCTTATGTTGTTAT  
TTTTGTGATTATGTCTCGTTCTCCTTCAGGGGAGTCGTGGCATAAAGCTATCTATACATG  
TAGCACACATTTAATGGCCATGTTTGTGGCCTTTCTCTCTGTTGTGGGTGCATTTGCTGG  
CTATAGGATTTCTACAATACCTAAAGATCTACGTGTGATATGTACCTTGGGATATCTTGTT  
CTTCCGAAGTGTTTAACCCAGTAATCTATGGCATGAGAACCAAGGAAATCAGAGTTCA  
AATTGTTAAATATTTGTCTTCTAATAAGGTAAATCTGCATTAA

>ZS2\_or114-1a\_allele\_B

ATGGATTATAGGACATTAACTTTTCTCATAACGAATTCTACTTGATTGGATTACAGAGT  
CTAAACGAGTTTCGTCAGTATCTGTTTCATCCCATTTTAAATCTTGTTTGTGTTCGAATTGT  
CTGCTAATGGAATTATAATGTTTGTGGTTATAAAAGAAAGAAAGTTGCATGCTCCCATGT  
ACATTCTGATTGGGTTCATTGCAGCTCTGGGCTTTATACAACCACTATTTCTTCTTCCAA  
GAATGTTAGTCAGTTTTCTCTTTGGCAAAAATATGATTTATAGAAACGAATGTCTCATTC  
AAATGTTTTGTATGCATATGGCGGGTTTGTTCAGTCAAGTATATTGGTCATGATGGCAG  
TGGACCGCTTTTTTCGCCATCATTTTCCCCTTGCAGTACCATGACTTTGTAACCTTTAAA  
CCTCATTAATATTCTGTTTGTTCCTTTTATCCGTAACCTTGCTTTATGTTACCTCAATGGT  
GGTTTGTATTGGGCCACTATATTTTGTAAATCAAACGAGATTTACCACTGTGTTTGTGAG  
CATACATCTGTTGTTAATATAGCCTGTGGTGATCGTACTAAGAATTACATGGCTGGGATA  
ATCGGTTTCAGTTTAAACAACAAGCGACTGTGTATTCATTTTCTGTTCTTATGTTGTTATTT  
TTGTGATTATGTCTCGTTCTCCTTCAGGGGAGTCGTGGCATAAAGCTATCTATACATGTA  
GCACACATTTAATGGCCATGTTTGTGGCCTTTCTCTCTGTTGTGGGTGCATTTGCTGGCT  
ATAGGATTTCTACAATACCTAAAGATCTACGTGTGATATGTACCTTGGGATATCTTGTTCT  
TCCGAAGTGTTTAACCCAGTAATCTATGGCATGAGAACCAAGGAAATCAGAGTTCAA  
ATTGTTAAATATTTGTCTTCTAATAAGGTAAATCTGCATTAA

>ZS2\_or114-1b\_allele\_A

ATGGATTATAGGACATTCAACTTTTCTCATAACGAATTCTACTTGATTGGATTACGGAT  
CTAAACGAGTTTCGGCAGTATCTGTTTCATCCCATTTTATGCTTGTTTGTGTTCGAATTG  
TTTGCGAATGGAATTATAATGTTTGTGATTATAAAAGAAAGAAAGTTGCATGCTCCCAT

GTACATTCTGATTGGGTTCATTGCAGCTCTGGGCTTTATAGAACCACTATTTCTTCTTCC  
AAGAATGTTAGTCAGTTTTCTGTTTGGCAGAAATGTGATTTATAGAAACGAATGTTTCA  
TTCAAATGTTTTGTCTGCATATGGCCGGTTTATTCCAGTCAAGTATATTGGTCATGATGG  
CAGTGGACCGATTTTTTGCCATCATTTTCCCCTTGCAGTACCATGACTATGTAAACTTTA  
AAACCTCATTAATATTCTGTTTGTCTCTTTTTATCCGTAACCTTGCTTTATGTTGCCTCAAT  
GGTTGGTTTGCTGGGGCCACTATATTTTTGTAAATCAAACGAGATTACCCTGTGTTTG  
TGAGCATACATCTGTTGTTAATTTAGCCTGTGGTGATCTTACTAAGAATTACATGGCTGG  
GATAATCGGTTTCAGCTTAACATCAAGCGACTGTGTATTCAATTGTCTGTTCTTACATTGT  
AATTTTTGTGATTATATTTTCGTTCTCCTTCAGGGGAGTCGCGCCAAAAAGCTATCTATAC  
ATGTAGCACACATTTAATGGTCTTGGTGGTGGCCTTTCTCTCTGTTGTGGGTGCATTTGC  
TGGCTATAGGATTCTTACAATACCTAGAGATCTACGTGTGCTATGTACCTGGGATATCT  
TATTCTCCGAACCTGTTTTAACCAGTAATCTATGGCATGAGAACCAAGGAAATCAGAG  
TTCAAATTGTAAATATTTATCTTCTAATAAGGTAAATCTACATCAGTGGTCTTCCCTATT  
TTTTTCATGAGAGCCACACTGATACAGTAGGTAGAACCCAAAATGAAGAACACTGATC  
TACATTAA

>ZS2\_or114-1b\_allele\_B

ATGGATTATAGGACATTCAACTTTTCTCATAACGAATTCTACTTGATTGGATTCACGGAT  
CTAAACGAGTTTCGGCAGTATCTGTTTCATCCCATTTTTAATCTTGTTTGTGTTCCAATTG  
TTTGCGAATGGAATTATAATGTTTGTGATTATAAAAGAAAGAAAGTTGCATGCTCCCAT  
GTACATTCTGATTGGGTTCATTGCAGCTCTGGGCTTTATAGAACCACTATTTCTTCTTCC  
AAGAATGTTAGTCAGTTTTCTGTTTGGCAGAAATGTAATTTATAGAAACGAATGTTTCAT  
TCAAATGTTTTGTCTGCATATGGCCGGTTTATTCCAGTCAAGTATATTGGTCATGATGGC  
AGTGGACCGATTTTTCGCCATCATTTTCCCCTTGCAGTACCATGACTATGTAAACTTTAA  
AACCTCATTAATATTCTGTTTGTCTCTTTTTATCCGTAACCTTGCTTTATGTTGCCTCAATG  
GTTGGTTTGCTGGGGCCACTATATTTTTGTAAATCAAATGAGATTTACCCTGTGTTTGT  
GAGCATACATCTGTTGTTAATTTAGCCTGTGGTGATCTTACTAAGAATTACATGGCTGGG  
ATAATCGGTTTCAGCTTAACATCAAGCGACTGTGTATTCAATTGTCTGTTCTTACATTGTT  
ATTTTTGTGATTATATTTTCGTTCTCCTTCAGGGGAGTCGCGCCAAAAAGCCATCTATACA  
TGTAGCACACATTTAATGGTCTTGGTGGTGGCCTTTCTCTCTGTTGTGGGTGCATTTGCT  
GGCTATAGGATTCTTACAATACCTAGAGATCTACGTGTGCTATGTACCTTGGGATATCTT  
ATTCTTCCGAACCTGTTTTAACCAGTAATCTATGGCATGAGAACCAAGGAAATCAGAGT  
TCAAATTGTAAATATTTATCTTCTAATAAGGTAAATCTACATCAGTGGTCTTCCCTATTT  
TTTTTCATGAGAGCCACACTGATACAGTAGGTAGAACCCAAAATGAAGAACACTGATCT  
ACATTAA

>DQC1\_or114-1

ATGGATTATAGGACATTCAACTTTTCTCATAACGAATTCTACTTGATTGGATTCACGGAT  
CTAAAAGAGTTTCGGCAGTATCTGTTTCATCCCATTTTTATTCTTGTTTGTGTTCCAATTGT  
TTGCGAATGGAATTATAATGTTTGTGATTATAAAAGAAAGAAAGTTGCACGCTCCCATG  
TACATTCTGATTGGGTTCATTGCAGCTTTGGGCTTTATAGAACCACTATTTCTTCTTCCA  
AGGATGTTAGTCAGTTTTCTGTTTGGCAGAAATATGATTTATAGAAACGAATGTCTCATT  
CAAATGTTTTGTCTGCATATGGCTGGTTTGTTCAGTCAAGTATATTGGTCATGATGGCA  
GTGGACCGATTTTTTGCCATCATTTTCCCCTTGCAGTACCATGACTATGTAAACTTTAAA  
ACCTCATTAATATTTGTTTGTCTCTTTATATCCGTAACCTTGCTTTATGTTGCCTCAATGGT  
TGTTTGTCTGGGGCCACTATATTTTTGTAAATCAAACGAGATTTACCCTGTGTTTGTGA



GCATACATCTGTTGTTAATTTAGCCTGTGGTGATCTTACTAAGAATTACATGGCTGGTGT  
AATCGGTTTCAGCTTAACATCAAGCGACTGTGTATTCAATTGTCTGTTCTTACATTGTTAT  
TTTTGTGATTATATTTTCGTTCTCCTTCAGGTGAGTCACGACAAAAAGCTATCTATACATG  
TAGCACACATTTAATGGTCTTGGTGGTGGCCTTTCTCTCTGTTGTGGGTGCATTTGCTG  
GCTATAGGATTCCTACAATACCTAGAGATCTACGTGTGCTATGTACCTTGGGATATCTTAT  
TCTTCCGAACGTGTTTTAACCCAGTCATCTATGGCATGAGAACCAAGGAAATCAGAGTTC  
AAATTGTTAAATATTTGTCTTCTAATAAGGTTAATCTACATTAA

>DQC2\_or114-1\_allele\_A

ATGGATTATAGGACATTCAACTTTTCTCATAACGAATTCTACTTGATTGGATTCACGGAT  
CTAAAAGAGTTTCGGCAGTATCTGTTCATCCCATTTTTATTCTTGTTTGTGTTCCAATTGT  
TTGCGAATGGAATTATAATGTTTGTGATTATAAAAGAAAGAAAGTTGCATGCTCCCATG  
TACATTCTGATTGGCTTCATTGCAGCTTTGGGCTTTATAGAACCACTATTTCTTCTTCCA  
AGGATGTTAGTCAGTTTTCTGTTTGGCAGAAATATGATTTATAGAAACGAATGTCTCATT  
CAAATGTTTTGTCTGCATATGGCTGGTTTGTTCAGTCAAGTATATTGGTCATGATGGCA  
GTGGACCGATTTTTTCGCCATCATTTTCCCCTTGCAGTACCATGACTATGTAAACTTTAAA  
ACCTCATTAATATTCTGTTTGTCTCTTTATATCCGTAACCTTGCTTTATGTTGCCTCAATGG  
TTGTTTTGCTGGGGCCACTATATTTTTGTAAATCAAACGAGATTTACCACTGTGTTTGTG  
AGCATACATCTGTTGTTAATTTAGCCTGTGGTGATCTTACTAAGAATTACATGGCTGGTGT  
TAATCGGTTTCAGCTTAACATCAAGCGACTGTGTATTCAATTGTCTGTTCTTACATTGTTAT  
TTTTGTGATTATATTTTCGTTCTCCTTCAGGGGAGTCGCGCCAAAAAGCTATCTATACATG  
TAGCACACATTTAATGGTCTTGGTGGTGGCCTTTCTCTCTGTTGTGGGTGCATTTGCTG  
GCTATAGGATTCCTACAATACCTAGAGATCTACGTGTGCTATGTACCTTGGGATATCTTAT  
TCTTCCGAACGTGTTTTAACCCAGTAATCTATGGCATGAGAACCAAGGAAATCAGAGTTC  
AAATTGTTAAATATTTGTCTTCTAATAAGGTTAATCTACATTAA

>DQC2\_or114-1\_allele\_B

ATGGATTATAGGACATTCAACTTTTCTCATAACGAATTCTACTTGATTGGATTCACGGAT  
CTAAAAGAGTTTCGGCAGTATCTGTTCATCCCATTTTTATTCTTGTTTGTGTTCCAATTGT  
TTGCGAATGGAATTATAATGTTTGTGATTATAAAAGAAAGAAAGTTGCACGCTCCCATG  
TACATTCTGATTGGGTTCATTGCAGCTTTGGGCTTTATAGAACCACTATTTCTTCTTCCA  
AGGATGTTAGTCAGTTTTCTGTTTGGCAGAAATATGATTTATAGAAACGAATGTCTCATT  
CAAATGTTTTGTCTGCATATGGCTGGTTTGTTCAGTCAAGTATATTGGTCATGATGGCA  
GTGGACCGATTTTTTGCCATCATTTTCCCCTTGCAGTACCATGACTATGTAAACTTTAAA  
ACCTCATTAATATTTGTTTGTCTCTTTATATCCGTAACCTTGCTTTATGTTGCCTCAATGGT  
TGTTTTGCTGGGGCCACTATATTTTTGTAAATCAAACGAGATTTACCACTGTGTTTGTGA  
GCATACATCTGTTGTTAATTTAGCCTGTGGTGATCTTACTAAGAATTACATGGCTGGTGT  
AATCGGTTTCAGCTTAACATCAAGCGACTGTGTATTCAATTGTCTGTTCTTACATTGTTAT  
TTTTGTGATTATATTTTCGTTCTCCTTCAGGTGAGTCACGACAAAAAGCTATCTATACATG  
TAGCACACATTTAATGGTCTTGGTGGTGGCCTTTCTCTCTGTTGTGGGTGCATTTGCTG  
GCTATAGGATTCCTACAATACCTAGAGATCTACGTGTGCTATGTACCTTGGGATATCTTAT  
TCTTCCGAACGTGTTTTAACCCAGTCATCTATGGCATGAGAACCAAGGAAATCAGAGTTC  
AAATTGTTAAATATTTGTCTTCTAATAAGGTTAATCTACATTAA

>HHD1\_OR114-1\_allele\_A

ATGGATTATAGGACATTCAACTTTTCCATAACGAATTCTACTTGATTGGATTCACGGAT  
TTGAAAGAGTTTCGGCAGTATCTGTTCATCCCATTTTTAGTCTTGTTTGTGTTTCCAATTG

TTTGCGAATGGAATTATAATGTTTGTGATTATAAAAGAAAGAAAGTTGCATGCTCCCAT  
GTACATTCTGATTGGGTTCATTGCGGCTCTGGGCTTTATAGAACCAATATTTCTTCTTCC  
AAGAATGTTAGTCAGTTTTCTGTTTGGCAGAAATATGATTTATAGAAACGAATGTCTCAT  
TCAAATGTTTTGTCTGCATATGGCGGGTTTGTTCAGTCAAGTATATTGGTCGGGATGGC  
AGTGGACCGATTTTTTGGCATCATTTTCCCCTTGCAGTACCATGAGTATGTAAACTTTAA  
AACCTCATTAATATTCTGTTTGTCTCTTTTTATCCGTAACCTTGCTTTATGTTGCCTCAATG  
GTTGGTTTGTCTGGTCCACTCTATTTTTGTAAATCAAACGAGATTTACCACTGTGTTTGT  
GAACACACATCAGTTGTTAATTTAGCCTGTGGTGATCTTACTAAGAATTACGTGGCGGG  
TGTAATCGGTTTCAGTTTAACATCAAGCGACTGTGTATTCATTGTCTGTTCTTACATTGT  
TATTTTTGTGATTATATTTCGTTCTCCTTCAGGCGAGTCGCGCCAAAAAGCTATCTATAC  
ATGTAGCACACATTTAATGGTCTTGGTCGTGGCCTTTCTCTCTGTTGTTGGTGCATTTGC  
TGGCTATAGGATTCCTTCAATACCTAGAGATCTACGTGTGCTATGTACCTTGGGATATCTT  
ATTCTTCCGAACCTGTTTAAACCCAGTAATCTATGGCATGAGAACC AAAAGAAATCAGAGT  
TCAAATTGTAAATATTTATCTTCTAATAAGGTTAATCTACATTAA

>HHD1\_OR114-1\_allele\_B

ATGGATTATAGGACATTCAACTTTTCCCATAACGAATTCTACTTGATTGGATTACGGAT  
TTGAAAGAGTTTCGGCAGTATCTGTTTCATCCCATTTTTAGTCTTGTTTGTGTTTCCAATTG  
TTTGCGAATGGAATTATAATGTTTGTGATTATAAAAGAAAGAAAGTTGCATGCTCCCAT  
GTACATTCTGATTGGGTTCATTGCGGCTCTGGGCTTTATAGAACCAATATTTCTTCTTCC  
AAGAATGTTAGTCAGTTTTCTGTTTAGCAGAAATATGATTTATAGAAACGAATGTCTCAT  
TCAAATGTTTTGTCTGCATATGGCGGGTTTGTTCAGTCAAGTATATTGGTCGGGATGGC  
AGTGGACCGATTTTTTGGCATCATTTTCCCCTTGCAGTACCATGAGTATGTAAACTTTAA  
AACCTCATTAATATTCTGTTTGTCTCTTTTTATCCGTAACCTTGCTTTATGTTGCCTCAATG  
GTTGGTTTGTCTGGTCCACTCTATTTTTGTAAATCAAACGAGATTTACCACTGTGTTTGT  
GAACACACATCAGTTGTTAATTTAGCCTGTGGTGATCTTACTAAGAATTACGTGGCGGG  
TGTAATCGGTTTCAGTTTAACATCAAGCGACTGTGTATTCATTGTCTGTTCTTACATTGT  
TATTTTTGTGATTATATTTCGTTCTCCTTCAGGCGAGTCGCGCCAAAAAGCTATCTATAC  
ATGTAGCACACATTTAATGGTCTTGGTCGTGGCCTTTCTCTCTGTTGTTGGTGCATTTGC  
TGGCTATAGGATTCCTTCAATACCTAGAGATCTACGTGTGCTATGTACCTTGGGATATCTT  
ATTCTTCCGAACCTGTTTAAACCCAGTAATCTATGGCATGAGAACC AAAAGAAATCAGAGT  
TCAAATTGTAAATATTTATCTTCTAATAAGGTTAATCTACATTAA

>HHD5\_OR114-1\_allele\_A

ATGGATTATAGGACATTCAACTTTTCCCATAACGAATTCTACTTGATTGGATTACGGAT  
TTGAAAGAGTTTCGGCAGTATCTGTTTCATCCCATTTTTAGTCTTGTTTGTGTTTCCAATTG  
TTTGCGAATGGAATTATAATGTTTGTGATTATAAAAGAAAGAAAGTTGCATGCTCCCAT  
GTACATTCTGATTGGGTTCATTGCGGCTCTGGGCTTTATAGAACCAATATTTCTTCTTCC  
AAGAATGTTAGTCAGTTTTCTGTTTGGCAGAAATATGATTTATAGAAACGAATGTCTCAT  
TCAAATGTTTTGTCTGCATATGGCGGGTTTGTTCAGTCAAGTATATTGGTCGGGATGGC  
AGTGGACCGATTTTTTGGCATCATTTTCCCCTTGCAGTACCATGAGTATGTAAACTTTAA  
AACCTCATTAATATTCTGTTTGTCTCTTTTTATCCGTAACCTTGCTTTATGTTGCCTCAATG  
GTTGGTTTGTCTGGTCCACTCTATTTTTGTAAATCAAACGAGATTTACCACTGTGTTTGT  
GAACACACATCAGTTGTTAATTTAGCCTGTGGTGATCTTACTAAGAATTACGTGGCGGG  
TGTAATCGGTTTCAGTTTAACATCAAGCGACTGTGTATTCATTGTCTGTTCTTACATTGT  
TATTTTTGTGATTATATTTCGTTCTCCTTCAGGCGAGTCGCGCCAAAAAGCTATCTATAC

ATGTAGCACACATTTAATGGTCTTGGTCGTGGCCTTTCTCTCTGTTGTGGGTGCATTTGC  
TGGCTATAGGATTCCTTCAATACCTAGAGATCTACGTGTGCTATGTACCTTGGGATATCTT  
ATTCTTCCGAACGTGTTTAAACCCAGTAATCTATGGCATGAGAACCAAAGAAATCAGAGT  
TCAAATTGTAAATATTTATCTTCTAATAAGGTTAATCTACATTAA

>HHD5\_OR114-1\_allele\_B

ATGGATTATAGGACATTCAACTTTTCCCATAACGAATTCTACTTGATTGGATTACGGAT  
TTGAAAGAGTTTCGGCAGTATCTGTTCATCCCATTTTTAGTCTTGTTTGTGTTTCCAATTG  
TTTGCGAATGGAATTATAATGTTTGTGATTATAAAAGAAAGAAAGTTGCATGCTCCCAT  
GTACATTCTGATTGGGTTCATTGCGGCTCTGGGCCTTTATAGAACCAATATTTCTTCTTCC  
AAGAATGTTAGTCAGTTTTCTGTTTGGCAGAAATATGATTTATAGAAACGAATGTCTCAT  
TCAAATGTTTTGTCTGCATATGGCGGGTTTGTTCCAGTCAAGTATATTGGTCGGGATGGC  
AGTGGACCGATTTTTTGCCATCATTTTCCCCTTGCAGTACCATGAGTATGTAACTTTAA  
AACCTCATTAATATTCTGTTTGTCTCTTTTTATCCGTAACCTTGCTTTATGTTGCCTCAATG  
GTTGGTTTGTGTTGGTCCACTCTATTTTTGTAAATCAAACGAGATTTACCACTGTGTTTGT  
GAACACACATCAGTTGTTAATTTAGCCTGTGGTGATCTTACTAAGAATTACGTGGCGGG  
TGTAATCGGTTTCAGTTTAACATCAAGCGACTGTGTATTCATTGTCTGTTCTTACATTGT  
TATTTTTGTGATTATATTCGTTCTCCTTCAGGCGAGTCGCGCCAAAAAGCTATCTATAC  
ATGTAGCACACATTTAATGGTCTTGGTCGTGGCCTTTCTCTCTGTTGTGGTGCATTTGC  
TGGCTATAGGATTCCTTCAATACCTAGAGATCTACGTGTGCTATGTACCTTGGGATATCTT  
ATTCTTCCGAACGTGTTTAAACCCAGTAATCTATGGCATGAGAACCAAAGAAATCAGAGT  
TCAAATTGTAAATATTTATCTTCTAATAAGGTTAATCTACATTAA

### **Additional File 3.** Contigs containing orl14-1

>utg881\_574483\_585588

ATTAATGGGCCTCCTCTTCTCATGAAAGCCCAATCACTGATCGCCACATTTTTCTTACAC  
ACCTGATCGATATTACTCCTGATATCTCTTGCTGGAGTCGGGCGGAACTATTTCCGCCA  
TTTTTCGTTCCGCCTGTGTTCCGGTCACTCCGTGACATTAGCTTTTCTGTTTTATGCTAGG  
GGTGTTAGCTAGGTAGCTGTATTTGGCATATTTTATTTAAACCCAATTCTTCTACATCTGT  
GTACCTGAGTTATTTTCTGTTTTTCAATAATGTTACTGTTGATACTAGGGTTGTGCCGATA  
GACGATAGTATCGTGTATCGACGCTTCAGACATATCGCCAATGGCAGGCTTTCATGGCG  
ATAGGTCATGACGATAGTTGGCGAATGGTTATTATTATCATCATAGTTTAATATTAAC  
ACCCACAATGCATGCTTTTCTCACATGAGGGTTTGTGGGCTTCACTTTACGCGGAGAG  
CTTGTAAGAGAGAATTCCTTCTTGCACGTACCTGCACTTAATGCGCGTGTCTTGCTCT  
CCTTCTACCACTAAATCCAGTGCGCCGCGTCATGAGCAGCTGTGCTTCTCTCTGTCTCA  
CGTGACGCGCTCTCGCATCTGTCCGAAGTCTAAACATAAACTAAAGTAGTAATCCTTA  
TGCATTTGTTCAAGTTAATGCGTTAATGCGAGCTGCGGCAAACTTTACTTTTTGTTTAA  
AATATGACACGCTGCATATTAGCGCCTCTCTCTCACTCTCGCGTACGTGCAGAGAGCTG  
CGCTCTGTCCGAAGTCAGATCACTAGGTATTAATCCTGTTTATGATATGCATTTCAATGA  
GTTGTAGCAACACGTCCCTCGTGTTTAATATATGATTGTATTTAAAATATGATCGCGTTCC  
GCTGGACCGATGCGTTTAAAAAGGCACCTCATGAGAGCACCACTGCTTGACACGTGTA  
GTCTTCTGCAACAGCACTAAACCAATGCATTGAATTGTTTGTATGTGCGCGCACGTCCG  
TGTGCGTGCGCAGATGCATGTTTTTACAGATACTAAGTAATCATGATAGGGTTTTAATGA  
CGCGCTCGCATTAATGGCATCAGGTTTAAAAAGGTTGCGGTCATGACGGTGTGCTCTT  
GTTCTTTTTTTGTCCACCCATCAAGTGACTTGTTATAATGAGTAAAAAATTAACAAATAA  
AAAAATTTGTAACTACTGCCCCGCCCCCGATAATATCGTGTATCGCCGATTTACAG  
GCTGACGATAGGACGATCTGAAAATAGGGAATATCGCCCAACACTAGTTGATACTCTTA  
CAAACACAATTATGATGATTACTGATTTTGTACATACGGAATACTCCTGTCAGCAATAACC  
TGTTTGTGCTGAATGATGCATCTTATTTGATAACTTTTCATTTTAGGTGGTCACCGTGCTG  
CCAGATATACATAAGTAGGAAAAACATGCAAATTAATTGGCCTTAAAGAACCAAGTTTCG  
AAAAAATTACTAATACTAACCTACATCTAATCATCACTTTATAGATAGTGATAAGTGTC  
CATTAATTGCTAAAACCATACGTTTAAAGAGGACTATTTTATTTAATAAGAAAAATTTAC  
TGAGGTCCGGACCACAGTCACCTCATAGCTGGCTACGGCCATGATGATCACTTTTGCAC  
TCCTTCTTCTTCTTCTTCTTATTTCTTTACGCCATTTACGGATCTACGGCTATATTCATG  
GCGAGAACAAGTTAATCTATAAACAAGTTTTATTTCAGACAAGTTGATCCAGACACAGG  
TTGGAGGAGGGACAATTTGGCATCTCCAATCTGCATGTTTTTGGCCTGTGGGAGGAAA  
CCGGAGTACCCAGAGTAAACCACTTATCCACTCACCTTTAGTAAAGTGTTTATGACAGT  
GCCCTGAAGCATGATATTTAATCCAGTATTCCTTAGAGACTGCTCCATCAGTAAAAACT  
GTTTCATGAACCTCCAAGAATCCTGGAAATCTCTGGAGATATTAAGTGTGTAAATAGAAG  
GCCTCTCATAACAAGTTGAAAGCTAATTAAATCACCAGATAATGGAAACATCTAGATAA  
TACTAAAATTATGAAGACAGAGTTTTTTTTTGAGACACAAATGCCAGATTTACTAAAC  
AGAGCATGTTAGCATGAGAGCACAATTTCAAAAAAGCACAAATGGGAGTGAACGTTTC  
TGTGGGTGATTTACTGACAATGTGCACATTAAGGGGGTTTTTCACACCTGCCTTGTTTAC  
CAGAGTTCGATTGCTCAGTTGGTGCAGTTCGTTTGGGCAGGTGAGAATGCAGCAATCG  
AACTCTGGTGCGCACCAAAGCGGACCAAACAAGCGGACCGAGACCAGCTTGCAGA

GGTGGTCTTGGTACGCTTTCAAACAAACTCTAGAGCGGTTTCGTTTGTGGTGAGAACAC  
GATCCGAGATCGAACCGACCTAACTGCAAAAGTACTGCGCATTTTGGACTAAACCAGC  
TGCTCTAGTCAACTGTGCAGTGCATTATCGGATGAGGAAGTGTTTGTGACCGTTTTTA  
TTAGCAATATTAGCACAATGACAAATCGCGGACATACCTGGAATTGCGAGGAGGTGCG  
GGCGGAGCCTTGGAATAATTTTGTCTTCGCCGTTTGTAGTGCATTAAATCGTTGTTTTC  
AAGCCGCATCCACGATTCATTCTGAAAATGAACAGTTTGTCTAGAGTGCTGTATACAAA  
CTATGTATAACAACCATGGATACATAATTACAGCGCACAGCCGTCTGTCCATGGTGTCTG  
CTGTATTATCCTTCTTTTGTTTACTTCCAGGGGTTCGTTGGAATTTGCCGCACGTTGAT  
TCTGACCAATCGTGAAGCTGTTTAGGAAATACGTTCAAATACATGTGGCCAATAAGTGA  
TGTTGATCTTATCACATGACAGAATTTTGGTTCGTTTCAATTGGTGCGGATCAGAGCAAT  
CAGTGTGGTGTGAAATGGAACCAAATCTGCTAAAAAAGTAATGTATAATTTTTTGCTTT  
TGGTCCGGACCAAATGAACCGAATTACAGATGTGAAAAGCCCTAAAGAACACATCATC  
TAATTTCCATCAGAATACTCTCACCTCACAAATTTTGCATCTAAAATGAAACTTACAAGT  
TTTATTTAAAGAGACTGTTTATCATTGTCATATGGAAAAAGGTCAGTTGCCAAAATAATT  
GGCAAAAATGTCCATGCCGTTTCAGAGCTAATTTTGTGTCATAAGTAAATCCTGACAGT  
ATAAATTTATAAACTTTACCAGTATGAAAGAACATCATCACCATTGATCCATAGCAGAGG  
ATGGCCTGACCACTTACAGTATTGTGCAAACGTATTTGGCCACCACCAGTTGTTGTTTT  
AGCACAATTTTTGCTCTCTTAATTAAGATATGAAAAATTTGGCTTCTTCGGGCAAAAGT  
CAGCATTTACTGTGGCCTTAAAGTCCCAGGGGCTTCAGTCCCAGTACTCGCTTTTATTC  
AGATTTCACTCAGATTTACATTCATTCAAAACCGGACAATCACACTGCTGTTGCTTTCC  
TCGAACATTGCATTTTTGAGATTAAACATCGATCTTAAAAGTAATAAGTCAGAGTTTAT  
GCTGCTTGGCTCAATCCATCAATTACGCAAAGCTGAATCTCCATCACTTAAAGTAAATG  
TCTCTGTCTTGAGTTTTCAAACAAAACAAAAGAATCTGGGGATGATATTTGACACTCAT  
TTATCATTTGGACCAAAGCTATATTTAATGTTGCGGAAAAACTGATTAATGCGTTTGTT  
TTTTCTTGCAATTGATTATTGCTTTGCTCGCTTGAGTTTTCAAATACCTTTAATACACAAT  
ATGTTCAAACTCAGCTCCCAGAATCCTAACAAGGATGAGAACTAGAGAGCATGTCAC  
TCCCATCTTGTAGTCGCTAGATTGGCTTGACGTCAGGTTTCGTATTCAATTGAAAATTCT  
TATGCTTACATCTAAAGCCTTAGCCCCACAATATCTATTTGAACTTTTACCAGTTTATACT  
CCCAGACGTGAGCTCCGTTCTTTTGAAGTTAGGCCTCCTCCTGACTACTCGCATGCGCTC  
CATGGGTGACAGGGCTTTCTCTTCCTTTGCTACAAAACCCTGGAAGTATATTAGACAT  
GTAAATCTTTTAGTGCTTTTAAAGCTTCTTTCAAACCTATATTTTAACTGGTTAATA  
TGTAATTTTCTCAGATTAGATGTTGTTCTTTTATTTTCTAGTTATTAATGCATTGTTTACC  
TTTTAAAGTTGCACTCTTCTGTGTAAAGCAGTTTGATAATAACCGTTTAAAGGCGCTATA  
TAAATAAAAGTTTATAATTTTATATTATTGTTTTTTAGGCTAAGAAGATCCTGCAGTTTTT  
TATAGTTCACAAAACAAAAGATTTTATTCAGTCATAATCCTCATCTTCTGTGAGCTGTTA  
ACTTATGAGTTCATTACTGCAACACATATTTAATAAAAAAGACAGACTAAAAAGAATGA  
TATGCTTACATAATAGCCATTACTCCTTCTCTCACTAACATAATTATACATCTAATTATAGT  
ACATCTTTACATTTCCAGAACATTGCCTTTAACTGCCCTCAATGCATACTCATTTGTAA  
AAAAACCCAGTAGAACTCATTGTCCCAACCTTGTATCAGGGGAGGGGAGCAAGGAATA  
TTAAGAGAGGCACCACTTTGTATTAAATCAGTAGGGGAGAGAGATTTTGTAGATGCTG  
CTATCGCAGACAAAACTGTTGTTTTTTATCTTATGTTAAGAATTGCTTTAGTATTTAACT  
GATAAAAATATAGATGCTTTATTTATTTCAAATCTGCAAATGAAATGTAATAACATATTTG  
ATTTGGACAACATTAATGCTTAAATGCAAGTATATGTTATTTAATGATATATTTTGATAAG  
CTAAAGAATTGTTTCTGTAAATAATCTTGTTCTTATGTCTTTACAGTAAACTTTACCTAA

GGAATGGATTATAGGACATTAAACTTTTCTCATAACGAATTCTACTTGATTGGATTACAG  
AGTCTAAACGAGTTTCGTCAGTATCTGTTTCATCCCATTTTAAATCTTGTTTGTGTTCCAA  
TTGTCTGCGAATGGAATTATAATGTTTGTGATTATAAAAGAAAGAAAGTTGCATGCTCC  
CATGTACATTCTGATTGGGTTTCATTGCAGCTCTGGGCTTTATACAACCACTATTTCTTCTT  
CCAAGAATGTTAGTCAGTTTTCTGTTTGGCAAAAATATGATTTATAGAAACGAATGTCT  
CATTCAAATGTTTTGTATGCATATGGCGGGTTTGTTCAGTCAAGTATATTGGTCATGAT  
GGCAGTGGACCGCTTTTTCGCCATCATTTTCCCCTTGCAGTACCATGACTTTGTAACCTT  
TAAAACCTCATTAATATTCTGTTTGTTCCTTTTATCCGTAACCTTGCTTTATGTTACCTCA  
ATGGTTGGTTTGATTGGGCCACTATATTTTGTAAATCAAACGAGATTTACCACTGTGTT  
TGTGAGCATAACATCTGTTGTTAATATAGCCTGTGGTGATCGTACTAAGAATTACATGGCT  
GGGATAATCGGTTTCAGTTTAACAACAAGCGACTGTGTATTCAATTTCTGTTCTTATGTT  
GTTATTTTTGTGATTATGTCTCGTTCTCCTTCAGGGGAGTCGTGGCATAAAGCTATCTAT  
ACATGTAGCACACATTTAATGGCCATGTTTGTGGCCTTTCTCTCTGTTGTGGGTGCATTT  
GCTGGCTATAGGATTTCTACAATACCTAAAGATCTACGTGTAATATGTACCTTGGGATATC  
TTGTTCTTCCGAACCTGTTTTAACCCAGTAATCTATGGCATGAGAACCAAGGAAATCAGA  
GTTCAAATTGTTAAATATTGTCTTCTAATAAGGTTAATCTGCATTAACCCCTATGATATG  
GTTTCATTTGTTGTAGGCTATCTTTGTTTTCTGTTCCAACCTACTGCGTACATGGATGATG  
TTTGTAATTAGTCTGTAATTTGTACATACATGTTAATAATACATCAACTTTTTGTTAGATT  
GATACAGTAGACGAATTGGTAGAACAGATATGCATCTATTCATTCTCTTTTGTGTGTGAT  
TGTCATATGCGTACATACCTAAAAGCATCCTGAAATTTTGTATGACTGTATATGTAACAT  
TTAATTCTGGTATGATTATAAACATGCCTTTACAAATAAAATGCAACAAAGTTGTGTTGG  
ACTGTTGTGTTTCATTCTGTGAAATGTACTGGCTACTCATGTTTACACTTCATTCAATTTT  
TCCAATGACAAACATTTCTTAAGAAATCTGCTATTTGTTGAGGGATTCTGTGTTTTCTTA  
GTGTATGAACATGTATTCAGTGACTGCATTTGCCGTTTGCACCTATCAATCTTATTACAAT  
TAAATGACTCAATACATTTTGTTTTATGACAGTTTGTGCACTATGCATATTTGCTCATTTA  
AAGTACAGTAAAGTTTAGATTTAAATATTTCAATATTTTCTTATTTTACAAATGACATACAT  
TATATTAAAAGAAATCTGCTTAGTTATTTACTTGCTATTTTTTCAAAGTAAACGACACTAC  
AGTAAACACATAGTTTTATGTATCGTAGTGCTTCCCCCAGCTTATCTTTCTTATAGAAATG  
GTTAAAAAATTAGCTTGAAGTTCATTATCTGAAAAGTACTCACCTACTTTTTGTTTTAA  
CAACCTACAAAGTTTAAAATTCACATGAGGGAGATATACAATTTTCGTGAGGGAGCAG  
ACTGTAGGCCATTAAACAAGGTACACTCTGTTTTAATTATAAATCCACATTATGTTTTGAA  
AGGTAATCTTCTAATATTTTAATTAACCACCAGAGTATACAAACATCTGTGTCCTTCACC  
CTGGTGTCAATCAGGATTTTGAATTTGGCCCCACCTTCTAACCCACGCATGTTTATAGC  
ATTTTAAATTTTTTACTGTTACACCAATCCCCACATTTTATAGTGCTTTGTTGTCAGGATCA  
AACCCACCGTGTCAATTCCCCAGCATATGGGTCATATTCTAGCTTCACTTACCTGTGGA  
GGATTCCAGAAACAGATGAAGCAATGTCCCCAAGTAAACAGAGCAAGGCACCACTGA  
AAACAAATCTGATATTTACAACCAGAAAAAATTACACAGAATGTTTCATTGCTGCTCTG  
AAGTGGAATAAATGCATTCTCACTCATTTACTGCATTTACTCACTTTAATTCATTTATTT  
TCTATTCCTGAGAATAGAAATACGTTGGTAAAAAAAATTTATTTTGTGTATTTGGTATA  
ATACAATGTGTTTGTGTGGTTTATGCTAAAAAAAACACACATTTTTTTCCACATACCGTA  
CATTTTTCTAGCTCCAGATATCCTGCATTCCTTAAGAGTTCTGATTTTGTACAAAACCTCA  
TCGATCTGAAAAACGCTGTTTGCCTGATTGGCCAGCTAAACTGTACATTGTGATTGGCC  
TGAATACCTCTGATGTCAGCCGGAATGTGACGCTTCTTACCAATGTTTGAAAGATTTG  
CTCACAATGCAATGCTGACAGGAGTTAGCTTACAGGCTATGAGTCAAAGCTGGAGGAA

TTATGATAATGTTGCTCTTATCCACGTCAATAGGCCAGGAAGTAAACTGTTGCCTAAA  
ATCCAAGAAGTCCAAGAAAAGAGATTTACGTTGGAAACGATAACTCGCATCATCATTTA  
CTTTGGGGTTTGTACCTTTTGCATATAGTTGCAAATGTACTGTATGTGCAAAAGAGGCAT  
CTGCTGTGCTTTGATGTAGGAAATGTAGGAAAATTGCAGTGGACCTAAAAAGTCTGTA  
ATTTGTGCCATCAGCTCTTTGCAGTATAAGCTCCATGCACTTGCACATAATTAGATGTTA  
GTGCGATTGAGCGAAAGTCTTTAAAGGCGCTAGATTGAGGTGTTCTAAGTACTGGTATA  
ATGGTGGTGTTTTTGCATGCTACATGTCTAAAAACACTTGAAACAATCTGGTACATACA  
TAACCTAATTGGGATGCACATTCTTTTAAACAATGTTTCATAAAACAATGCCATCTGGA  
CCGGTAGCCTTATTTGGTTTAATTCTTCTAAGCACTCTGGTTACCTCTCCCTCTTCAATTT  
TCATTGCATTAGATCAGGGGTGCTCACACTTTTTTCTTACCAAGGGCCAAAAATGAAAC  
CTCACCGAAGGTAGGGGGCTGCAAGTAAATGTTGCTGTGTTATATTAAAATTAAAGTTG  
CCCTGATTCTTCTAATTTCAAATATTAAAACAATAAATAAGAAAACATTACTGTGTTTAA  
GCATAACTAATGCAGTTTTATTTTCAAAGGTATCTGTTGTAAAAAGAAACAATTTTGCC  
AATCATTTTAATTTCCCTTTTGCCTGTGTGCCACAACCTCTCCCTTATTAACCTAATAGTA  
ACCGTCTACCCAAGTTCATTGAGTTCATGACGCAAGCTATACACCTTCAAGTATGCATG  
TACATTAAAACATTTATTCATTTAATTCCTTGCATTTAATTTCAATTGACATTTTTGTAAT  
GTACAAATAAAACAAAAAATTAAATTTTAGAAAATGTTTAATTAGAAATTGACATCGGC  
GTCAATGACGTTTATCCTTTTTCTTATCTGATGTGGCACGACGGGCCAAATTAAAGATC  
ATTGCAGGCCAACTTTGGCCCGCAGGTCCTAGTTTGGGTTCTCTGCATTAGAGTCTTT  
GCAAGTCTCATCATAACTTACATTTTTTCACATTATCTATAGCAGGGGTCTCAAACATGGT  
GCCCCGTATAGCCAGCACAGAGTCTGTAAGGTGCCACCAAAGCACATCATATTAATAG  
TCTTAATTGAACAAAAGGTTGAAGACGCCTGATCTACAGTATTGTCAATTTTCATTGGG  
TTAGAGTCTGTGTTGGTATCATCGTTGCATACAGCATTGCAATATCTACAGTATTGTCA  
AATTGTGAAAAACAGTTTTTAAATTATTAACAAAGGTATGGGGATCCTCGCCAAACCAT  
TGTTTCTTTTGTCTGCCAAGCATTGTGTTAAACCCCCTCCATGCACATTCCAAACATATA  
TATTATATTCCAAACATATACAGACCCCAGCAAGTACAAAAAACATAATCTGAGAGGGA  
ACTAACATTGTATATAAAAAGATAAGTACATTTGGTGTCTGCAAATTTTGGGGGACAAA  
ATGTTACAATAATGTAAAAATGAATCAAAAGAGCCACCCCAATGTCTTTACAATGTTT  
TGATGTGGAGATAAAAGGCTTTGTTTATTCCATGCTAGGGTACTGTATTTGGTTGCTAGG  
AAGAAAATTTGCATCCACTAGTGTTTATACTCCAAGTCACAAGTAAAACGGTTCAACCC  
CCGTGTCTCTACAATGTTCTGATGCAGAGATATAAGGCTGTGTTTATTTGGTTGCTAGGG  
TACTGTTTTTGGTTGCTAGGTAAAAAATTGGCATCCACTAGTGATTACACTCCAAGTCA  
CGAGTCAAACGGTCCAATCCGTGTCTCTACGATGTTCTGATGCAGAGATATAAGGCTTT  
GTTAATTCGGTTGCTAGGGTACTGTATTTGGTTGCTAGGGAAAAAATGGCATCCACTAG  
TGATTAGACTCTGATTCACAAGTCAAACGGTCCAACCCCTGTGTCTCTACGATGTTCTG  
ATGCAGAGATATAAGGCTTTGTTTATTCTGTTGCTAGGGTATTGTATTTGGTTGCTAGGG  
GAGTGGCTTGGGAGTGGCCAACGATGCTGCTCCATTAGCTACTTGCCAGCATGAATGAT  
ATAAACCAACCCCATATCGCCATGACATATAGATTTTAAAGATATAACTGTTTGAATTTTT  
TTCTAGGCTTCTCAAAAGTGGTTGCTAGGGGCGTGGCTCAATTCCTCTGTAAGGATCAC  
GAGAGACTGATTGGATGCCTGAGTACAATGAGCCCAACCCCATGTCTCTATGACAATGT  
GGTGCAAAGATATCCAACGTGAATTTTATGATTGCAGTCTATGGGATATGTTGTGACAC  
GAACCCATCCTGTCTAGGGTTGGAAAGGCCAGATGACAAAATATTAAAAGCTAAATTT  
CAGTTTTCCACCTCCCGCTCCTGTCCCATTTACCACAAACACAAGAATAGTTTTAAGA  
GTTTTATTCACTCTGTGTGGTCAGAAGCATCTCTTCGAAAGGGGATAAAGGCCAAAA

TAACAAACATAATAGGAATCTAAATTAATTTTAGATTATTAACCTTACCTAAGAAAAATAAA  
TAAAAATACAAAAGAAAAGCACTCTTCTTCCCTCACTCTCTAACTAAAAATAACCATGA  
GAAAAGAAGTAAACAACTAAAAGGCCATCCAGACCTACATCTCTGAAAGTAATTA  
ATTTAACAAAGGAAACAATAACTGAATGAAATGACACATATGTGCAATTAATAAGAATT  
AGGAACGAATAGGAAAGTGTCTTCACAGATTTTACAACAAGAGCCGATCTTAAAGACA  
CAATAAAGAGAACAACACTCTTGATCTACGACCGAATGTGAGCTCCGCAACGCGCTCT  
ACCGAAGCTCCTGCACACTAGCCGTTTCTCAATGTCAAGGATACTTCCTTGGCAGGAC  
TAGTCCTTACAAGTCACTTCCTTCAGAGGCTAGGCGAGGCTCCTTTTAAGCATTGGGAG  
AACACGTAAATGGAACAGGCTAGCAAGTGCACGTCATTACGTCATTGCGTGATTGAA  
AGGTGTGGTTTTCGGTGCTGCGCGCATAGGATTGTGGGTGATTTCAGTGCGCGAAGAGC  
GCAAAGGATACAAATTTGCATCCTTTCTGTATATGGGATATTTCTTGAACGAAGGACAT  
AGTCCTTGGCTGAAATTTGAGGATCCTTGACATTGGAACAGTCCTTCGACGGATGTC  
GATCACGCAGCATCCTCGAAATTCTAGCTTCCGAGGATCCTTCCTTGACATTGAGAAAT  
GGCTACTGTCTTCTCTCGTGCTTTATCCCGTCCTCACTCATTAGTTGCAGCTGCTCCCAA  
TCACACGGCACTGCCAGAGATAACGAGAAAA

>utg338\_52172\_63110\_reverse

GAATAAATCTACATAAAAAGTTAAAAACAACATTAAGTGGCTTAAGAACAGCATCACTA  
GTGGTCATATAAATGATGTCAGCATAGTCAATAATGGGCAGAATCAATTGAAAAATTAA  
CTTCTTTCTGACTTCAAGTGTAAGCAGTTTACAGATCTATAAAGTGTTTTAAGACAAC  
CATATATTCTCTTAGTAATATAGTTAATGTGAGGTTTAAAAGTCAGCTCAGAATCCATCC  
ACAGTCCAAGATATTTAAATTTGTCCAATATGACCATAGAAGAACCATCAGCAAAATAC  
AGTTGTAAGTTAAAGCACCCTGTGTAGGATCTACTCCCATCTAGCGGTAAAGCTCTAT  
ATGACAACCAACTGATTATTAGTTTCTAGCCCCCCCCATTTCGGAACGCGTTTTAACTAGT  
ACGGTGGCCCTGTCATGCCAAGGTTAACATGGCTTCCAGTAGCTAAAGCAAAAGCAAT  
GAAAAAAAATGAACAATTTGCATTGTCTTTGCCTTTGATCCGTCAAAGCACACAGATT  
TATGTTAAACATGTAAAAAGTTTGATTGTCATGATATGTCCGCTTAAATCACATAAGTT  
ACAAAAAGCAATCATAAACGTAGCTTAGACACTCCTTTTTTCATCCACGCGAGGAAAAA  
TATCACAGGGGCTGTTTTTCATCGATCAGATCACAAGTGGACGAGAGAGACATTACG  
TTTACACTTGGTGTTTAAATCCGTCTCTTTTTGTCCATTTTCGACCGCTTCTCTTCAGATT  
ACTGAGGAGATGGTCTGTGGACCAGTTCCTCTCCTGTCATTTACTCATGAGCTGGAGTA  
ATGACAGGTTTTAAATGGACGCGAACTAATGTCAGAGTCCAATGCTTATGTTTTAAGTA  
AACGTTACATGTCCGTGTATATGTAAGAGCTTTCTCTGATATTGGTGAAATAAGATCGCT  
CAACTTTCACACGCTTGTAATAATGAAACGAAAGACGCGCAGATCAGACGCTTTTATCA  
ATGAAAGGCTAAAAATAGCGCTGTACACCGTGTGTTTGTGTTAGAGGTCAGAAAAGAT  
GAAAAACATTTATCTCAGTACCTCAGATTACATAAATGGGCGGAGAGACGGCGTGTGG  
CTGTTCCAAGACATTAAACCACATGCATGTTTACACTAACAAAGTGTTACGCATACCCAT  
GCTATAGTTAGCCAAGGAACATAAACTTCAAGTTTACAACATAAACTGTATAGATGT  
AAACGAATATGCTGAATTACCTGTGGTGAAGATAGAAAGTAACTTGAGTACAATGAGC  
CCCATCTTGAAAACTAACTCCAATATTGACTTTGGTCTTGATGTTTTCTGTGCGGTT  
GTCGTTTTAAATCCCTGTTTCGCTTCCTTGCGGACTTGTTTTAATGTCCTCGAGAATAGT  
TCTTCAACAGGCTTTCAAAGCATTAGATCGCAGGTTTATCACGGCGTGCAGGCCGAAGG  
ATTCAGTCTAACGCAGGTCGCATATCCGGGCTGCATACGTCATCAAGCCTGGTTTATTTA  
AATTAAGTACGATTACATTCGCAAGTCATAAGCATATTACATCAATTTACAATTAATA  
AGAATAAATGTCAGCTTTATAATTGTTAATATTCTGAAATAAGACTGTCTTGATGACGTA



TACCGCCTACACATGCAACCTCCGTAGGCTTCAGCTCGCGGCCAGCTTGAGTGTGCTCT  
GAAAGCGCGAAAGGCGGAGCTTGAATTTAGGAATGTCCCTCGTCGGCGAATGTATTT  
CAAAGATGGAGGCACAACATGGATTACGCCAGAGAGCGCTACGGCGGTATGTATTTTA  
AATAGCAGATTCTACACTTACGAGAATACTTTGATTAGTGGGGTGAAGTAATTACACA  
TGAATGAGCACATACTTTTGAAGAAAACATGGGTTTTTGCTAAGAATTAATAAAAA  
AAGTACACACTGGAGCTTTAAGTGCACATGGTCACAAGTGATGTGATAGATTACATGT  
GATAGATTTGCTGTGATTTCACTCACTGTCTGACAAATGTAAATAAAATCTAAGAGTTC  
ATCTGGGTGCACTTGTTATGTACCCCACTAACAGTAGTCTATATATCCATATACATAGTCA  
CACAACATAATAACCAGACAAAACATATTTTTATGCAAAATTATTTATTATAAAAAATAT  
GCTCAGTTTGTATTTACAAAACCAGAAAACCTGGTATTTACTGTGTTTAGCTGTGTTTAC  
AGACATATTCAGTGATAGTAATCCCATTTTGTGTGTTTATAAAAACTCCTTTCTATTGGAA  
ACTGTACTCATTGGTGTACTCAACTGCACTCCAGTTGTATATGGAAGGAGATAATAAGA  
GAAATATCAGTATTGAGACTGATAAAATCCTGTTTTAGACAGTAAAACCTGTCACGGGG  
CAAGGTTTGTGTTTTGAATGGTTTGGTTTTGTTGGCGTCATGACAACATAATCATCATAT  
GTGCAGACTTTAATTAGGAAATATAACTAGTTTTAACAAACATGCCTTACTAAAAACATT  
ACTTGTGTGCATTTTGTGGCTAAACAAAGTGCCTGATGTATTTAAGATATGTTAGTGC  
AAGTTGTTTTCCGTTTGGACAGCTCTTACATTTATTTTAGTCTAGGAATAGTCTAATCCC  
TGTCGGGAAACCGCCCCATAGAGTTTATTATTTTCTTTTTTCAGTTTACAGCCATTGCC  
ACATTACTCCTCATCAGTTATATTAGAGTCCCATTTCATGTCACTTTTACCAAATTTAGA  
TGATATAAATGACATCATATGCATTACAGTCTCGCTTTGTTCAATATGTTCAAAACTCAG  
CTGCCAGAATCCTAACAAGGATGAGAACTAGAGAGCATGTTATTCCCATCTTGTAGTCC  
CTACATTGGCTTCACGTCAGGTTTTGTATTGATTTGAACATTTTATGCTCACATATAAGG  
CCTTATACCTATTGAACTTTTAACAGTTAAGATCCTGCAGTTTTTTATAGTTCACAAAAC  
AAAGGATTTTATTAGTCATAATCCTCATCTTCTGTGAGCTGTAAAGTGCCCATATTAT  
GACTGCTTTTTTCACAAGTTAAATAGGTGTATGAGTTCCATAAAACATGTTTCAAAAGT  
TGTTTGCTTGAAATAGCTTGTAGGAAAAGATTGTTACCCATCTCTAGTAGCCTCTGTTTC  
AGTGCATTTACAGATTGTGCCGTTTTGAGCTGGTCATTACATATTATGAGCTGCTGCTCC  
TTTGATCACGCCCCACTACTAACATCATGTGCCCGTGCGCATGCTCAGTGGTATCGTGA  
GCAGTACAGACCATACTGTATTATTTTTATATATTATTATTAATGGTTTATGTTGCCAACAG  
ACAAATCAAGCAAAAAAGTACCACTAATAAGTACACTCCAGGAGAAGAACTCATGA  
CACACAATGATTCCAGAGTACATTATTTTCGCAAATGACAGAAATTTAGACCCGGCGGG  
GGATGTATACTGCTTTTGGACCGCGTGCTAATTGCTAGAAGCTAGCGGGAGGTCCGGAC  
CTCGGGGTACGTTAGCCTCTTCAGAAAAGCCGGGTGCGTAAGGCCCGGTCTCGGTTA  
GTTTGGCAAAACACTTAGTTTGGCAAAGCACTATTACTTAGTTCATGTAGAATTGTAAA  
ATATTTTTTTTTACTTTTCGAATCTATTTCGAAATTACTATACAATTATAAAGTATAATTTACG  
GGATTAGCATCAATGTATGGTCTCTGTTTTGAGATACAGATGCTCTAGCATTGTAAATGT  
AGTATTTTGTGACAGATGACAACATGCAAAATATAACGTGACTTCTTACCTTTTGTGTTT  
GACATAACGATCGCGAATCGAATCAAGTCTGTTTCAGATGTGTGAATGATCCATGAAAG  
TCCAATAAAATCCAATGACCATTTTTGTCCACAGATGCGTATAATCCGTGAAATATAGAT  
ACATAGTCTTACATCAGATTTTCGCATGAACATCTTATTGTCTACACTCTGATGACTATTTG  
CGTCGTAAAACACTGTATATTACTCTTTAGGTTCCAATAAACACGCGTTAAACTTTGTT  
TTTAAAAGAGGGCGGGAGTATAATCCATAATATCCAATAGCGCTGTTATTTACAGTGAG  
ACATGATAACAGCAGGGTATCAGCGAAGTGACTGCTCTGTGCTCTCTCTAGCTCCCTGG  
TGCGTGGAGACCTGCGAGCGTGATGGTGGGCGGGAAAATTCAAACGGAATGTGACGA

AACGGCTAGTTACGTCACAACGGAGCTGAGTTTAAACTCGTGCAATCTGAGACTCAAG  
GCAGAGGACATTCAGAAACCCGTATCTCACTCAAAACAGCATGGATGGATTTTTTTCCA  
AGTTTGTATGCGTGTGGGAGCATCAGAGACACAAATGAACACCCCAAAGTGGGCACTT  
TAAGTGATGTTATGAGTTCATTACTGCAACACACATTTAATAAAAAAGACTGATTCAAA  
AGAATGATATGCTTACAAAATAGACATTACTCCTTCTACATAATTATATAGTACATCTTTA  
CATTTCCAGAATATTGCCTTTGACTGCCCTCAATGCATACTCATTGTTAAAAAAAAC  
CCAGTAGAACTCATTGTCCCAACCTTGTATCAGGGGAGGGGAGCAAGGAATATTTAAG  
AGAGGCACCACTTTGTATTAAATCAGTAGGGGAGAGAGATTTTGTAGATGCTGCTATTG  
CAGACATGCTGTAAAAACGACAAACTGTTGTTTTTTATCTTATGTTAAGAATTGCTTTAG  
TATTTAACTGGCAAAAATATAGAGGTTTTATTTATTTCAAATCTGCACATGAAATGTAATA  
AAATATTTAATTTGGACAACATTAATGCTTAAATGCAAGTATATATTATTTAATTATAAATT  
TTGATAAACTAAAGAATTGTTTCTTGTAATAATGTCGTTCCCTATGCCTTTACAGTGAAC  
TTCACCAAAGGAATGGATTATAGGACATTCAACTTTTCTCATAACGAATTCTACTTGATT  
GGATTCACGGATCTAAACGAGTTTCGGCAGTATCTGTTTCATCCCATTTTTAGTCTTGTTT  
GTGTTCCAATTGTTTGCGAATGGAATTATAATGTTTGTGATTATAAAAGAAAGAAAGTT  
GCATGCTCCCATGTACATTCTGATTGGGTTTCATTGCAGCTCTGGGCTTTATAGAACCCT  
ATTTCTTCTTCCAAGAATGTTAGTCAGTTTTCTGTTTGGCAGAAATGTGATTTATAGAAA  
CGAATGTTTCATTCAAATGTTTTGTCTGCATATGGCCGGTTTATTCCAGTCAAGTATATTG  
GTCATGATGGCAGTGGACCGATTTTTTGCCATCATTTTTCCCCTTGCAGTACCATGACTAT  
GTAAACTTTAAAACCTCATTAATATTCTGTTTGTCTCTTTTTATCCGTAACCTTGCTTTATG  
TTGCCTCAATGGTTGGTTTGTGTTGGGGCCACTATATTTTTGTAAATCAAACGAGATTTACC  
ACTGTGTTTGTGAGCATAACATCTGTTGTTAATTTAGCCTGTGGTGATCTTACTAAGAATT  
ACATGGCTGGGATAATCGGTTTCAGCTTAACATCAAGCGACTGTGTATTCAATTGTCTGTT  
CTTACATTGTTATTTTTGTGATTATATTTCTGTTCTCCTTCAGGGGAGTCGCGCCAAAAAG  
CTATCTATACATGTAGCACACATTTAATGGTCTTGGTGGTGGCCTTTCTCTCTGTTGTGG  
GTGCATTTGCTGGCTATAGGATTCCTACAATACCTAGAGATCTACGTGTGCTATGTACCT  
TGGGATATCTTATTCTTCCGAACCTGTTTTAACCCAGTAATCTATGGCATGAGAACCAAGG  
AAATCAGAGTTCAAATTGTAAATATTTATCTTCTAATAAGGTTAATCTACATCAGTGGT  
CTTCCCTATTTTTTTCATGAGAGCCACACTGATACAGTAGGTAGAACCCAAAATGAAGA  
ACACTGATCTACATTAACCCTGAGATATGGTTTAATTTGTTGTATCTTTGTTCTCTGTTCC  
AACTTACTGTGTACATGGATGATGTTTGTAAATAGTCTGTAATTTGTACATACATGTTAAT  
AATACATCAACGTTTTTGTTAGATTGATACAGTACATGAATTGGTAGAACATATATGAAT  
CTATTCATTCTCTTTTGTGTGTGATTGTCATATGCGTACATAAAAGCAACCTGAAATTTT  
GTTATGACTGTATATGTAACATTTAATTCTGGTATGATTATAAACATGCCTTTACAAATAA  
AATGCAACAAAGTTGTGTTGGACTGTTGTGTTTATCATTCTGTGAAATGTACTGGCTAC  
TCATGTTTACACTTCATTCATTTTTTCCAATGACAAACATTTCTTAAGAAATCTGCTATTT  
GTTGAGGGATCCTGTGTTTTCTAGTGTATGAACATGCATTCAGTGACTGCATTTGCCG  
TTTGCATTTATCAATCTTATTACAATTAATGACTCAATACATTTTGTTTTACGACAGTTT  
GTGCACTATGCATATTTGCTCATTTAAAGTACAGTAAGTTTAGATTTAAATATTTCAATTAT  
TTCATTATTTTACAAATGACATACATTATATTAAGAAATCTGCTTAGTTATTTACTTGC  
TATTTTTTAAAGTAAACAACCCTACAGTAAACACATAGTTTTATGTATCGTAGTGCTTCC  
CCCAGCTTATCTTTCTTATAGAAATGGTTTTAAAAATTAAAAATTAGCTTGAAGTTCATTA  
TCTGAAAAGTACTCACCTACTTTTTGTTTTAACAACTACAAAGTTTAAATTTACATAA  
GGGAGATATACAATTTTCGTGAGGGAGCAGACTGTAGGCCATTAACAAGGTACACTTCT

AATAATTTAATTAACCACCAGAGTATACAAACATCTGTGTCCTTCACCCTGGTGTCAATC  
TTTCTGGCATTGTTGGCCCCACCTTCTAACCCTAAATTTTTTACTGTTACACCAATTCCCACA  
TTTTCAGTGCTTTGTTGTGTCAGGATCAAACCCACCGTGTCAATACCCAGCATATGGGT  
CATATTCTAGCTTCATTTACATGTGGAGGATTCCAGAAACAGATGAAGCAATGTCCCCA  
AGTAAACAGAGCAAGGCACCACTGAAAACAAATCTGATATTTACAACCAGAAAAAATT  
ACACAGAATGTTTCATTGCTGCTCTGAAGTGGAATAAATGCATTCTCACTCATTTACTGC  
ATTTACTCACTTTAATTCATTTTATTGTCTATTCCCTGAGAATAGAAATTCATCTTGCACTG  
GCATTACATAACACAATGTAACAAACAATACAAAAGTCCACAACACATCCTTACAAAAT  
GAAAACATATACAGCACATTTACAGCACAGTTAAAATAATAGATTATTTAAAGGGCACC  
TATTTTCATTGGTAAAAAAAACAATGTGTTTGTGTGGTTTATGCTTCAAAAACACATTAT  
TTTCCACATACCATACATTTTTCTAGCTCCAGATATCCTGCATTCTCAAGAGTTCTGATT  
TTGTACAAATCTCATTGATCTGAAAAACGCTGTTTGCCTGATTGGCCAGCTAAACTGTA  
CATTGTAACCTCTCAATGCAATGCTGACAGGAGTTATAATATATAACATAACATAATATGTC  
AGATTACACGTTGCACATAGATGGCTGCACTGTGGTGCCATCTTCCAAGGTAAGGAAC  
TAGGTGTGATGTTGACAGCAACTTATCCTTCGATAGTCATATCGCCAACGTCTGCCGTA  
CAGCTTTCTTCCACCTTAGAAATATCTCGAAAATACGCCATATACTGTCTACATCTGACG  
CAGAGAAGCTTATCCATGCTTTTATGACCTCTAGAATAGACTATTGTAACCTCGCTACTCG  
GGGGATGCCATGCAAATCAAGTAAACAAGCTTCAGCTAGTTCAAAAACGCTTCCGCAAG  
GGTACTTACTCGATCTAAAAAGTACGACCACATAAGCCCAATTCTGGCATCTTTACACT  
GGCTACCAGTTAAATATCGCATACAATTTAAAATATCACTACTCACCTACAAAGCTTTAA  
ATGGCCTAGCACCTTCATACCTTAGAGAATTACTATCAGAATACAATCCATCACGCACA  
CTACGGTCACAAAATTCTGGTCTCTTGATTATCCCTAGACTATCAAAAGTGTCTAAAAG  
TGGAAGGTCATTTTCTTACTTAGCCCCTAAGCTCTGGAATGATTTACCAACCGATGTCC  
GAGAATCAGACACAGTCGATAATTTTAAATCTAGACTTAAACTTTTCTCTTCAACAAA  
GCATTTCGCATAATTTGTCTAGTAAAAGTACTTAACTCGAAATAGTTATTTGTACCGAACA  
AAGCACTCGCGGTCATAAAACAGACCAACCAATAAATAAATAAAAAACCTTATCTTAA  
CGTATAGTCGGATTGCGATTTTGAAGCTTTCGTGTTCTTGTGAATAGTATGCCATACAAA  
CCCGTTTGCCACTGAACCTGCATTAACGACGACAGTGAGGCATCCGGCCTTAGTCAAA  
CGGGTTGGCACGTACGGTTGGGTGGGCTTTTGGCGCTTCTTTATATTGCGAATACTAT  
GCCATACAGACCCGTTTGCCACTGAACCTGCATTAACGACGACAGTGGGGCTTCCAGC  
CTTAGTCAAACGGGTGGCACGTATGGTCGGGTGCGATTTTGGCGCTTTTTTGTGTCT  
TGTGAATAGTATGCCATACAGACCCGTTTGCCACTGAACCTGCATTAACGACGACAGTG  
GGGCCTCCAGCCTTAGTCAAACGGGTGGCACGTATGGTCAGGTTGCGATGTTGGCGT  
TTTCTCATGATCTTGTAATAGCATGCAATATAGACCCGTTTGCCACTGAACCTGCATTA  
ACGACGACAGTGGGGTTACAGGCCTTAGTCAAACGGGTCTACAGGTTTCATTTTCTCTT  
TCTCTTAAAAATCAGAAGGTGACCCTTAGTTACCATATATACCGTCGCAGTGGGCCCCC  
AATTTGCAAAATCCTCAACTGTGTATAATATAATTATGCCGCAATAGTTAGTCTGTCTGA  
AACTAAGCTGATTAAACCACAACACTGTGTGACACTTGCAATTACATGTGAACGGCCCC  
TACGCTAATATGATTTTGTTTTTCTCTCCCTGTCCTGTCCTCGACCCTGAGGACAATGGG  
ACAAACAGACCCAGTTCCGGTAGATGTGAAAGTCGACTCACCTCTGATCTACTGGTCG  
TCCATCACTGTGATGCCAGCTGATGCCTGACCAACGACCACCGGCAGAACCCGCTTA  
AACCCCGCTTAATCCCCGCTTAATCTCCTTATCCGTTTATATGTGTTTATATACATATAT  
CTCCCAAGGGTTTTTCCCTCCTAGGACTTTTTATTTTTTTTTTTCCTCGGCTCAACAACC  
CGGGGTTTTTGTTTTTTTTCTCCTAGGGGGTTTTTTTACCCCGGGGAGGTAGCCTGCTTG

GGCTTAATTTAGCTTCTTCTCCTAGACGTTACATTAGTAATACGCTCGTTCATAATGTCTG  
AGTCATAGCCTCAGCAAATTTGACAGCTTATGCTATTGTGTATTATGTTGTGCTATCTGTC  
ATTTTCTGTGCTTTTACTGCTTCTATTAATGTAAAGCTGCTTTGAAACAATTGAGTATTG  
TGAAAAGCGCTATATAAATAAAATTGAATTGAATTGAATTGAATTGAATTGAGTTAACTT  
ACAGGCTATGAGTCCAAGCAGGAGAAATTATGATAATGTTGGTCTTATCCACGTCAACA  
GGCCCAGGAAGTAAACTGTTGCCTAAAATCCAAGAAGTCCAAGAAAAGAGATTTACG  
TTGGAAACGATAACTCGCATCATCATTCAATTTGGGGTTTGTACCTTTGGCACATCGTTA  
ACACGTACAATGTACTGTATGTGCAATAAAGTCAAAGAGGCATCTGCTGTGCTTTGATT  
GAACATGTAGGCAAATTGCAGTGAGTGGATCTAAAAAGTCTGTAATTTGTGCCATCAGC  
TCTTTGCAGTATAAGCTCCATGCACTTGCACATATTAGATGTTAGTGCGATTGGGCGAAA  
GTCTTTAAAGGCGCTAGATTGAGGTGTTCTAAGTACTGGTATAATGGAGGTGTTTTTGC  
ATGCTACATGTCTAAAAACACTTGAAACAATCTGGTACATACATAACCTAATTGGGATG  
CACATTCTTTTAAAACAATGCCCTTAACTCTTTCACCGCCAGCATTTTAAAAAAAAGT  
TGCCAGCCAGCGCCAACGTTTTTCATGATTTTCACCAAAGTTTAATGCCTTCCAGAAAA  
TGTTCTCCTTCAAATATATAAACATACAATATACCAAATGAAAGAACAGACCCTCTGCTT  
TCAAACAAAAAAAACCTTTTCATCCTACCTTGAGTAGTTCTTTTGTAATCAGCTTTTGA  
ATATGGGTAGGTTTCTGCAAAAACACCACATTTTGAGCAAAAAGCAGAGATAATTAAAT  
TTTTTTGTGACGGACTTTTCATGGAGATCCCATTCAGAGTGATCTTTAAACAGACATG  
GACATGCAGCAACTTGCCAGAGGGCAATACTTCCGGGTTTAAAAAGTTGCGGAAGGG  
CGCCACCTAGTGGATAATAGTGGTATTGCGGAAAGACGGAAATACTCGTCATTGGCAG  
GAAAGCGTTTTCTCTTGATTGACGAGATATCTTGTCAATGGCGGGGAAAGAGTTAATGC  
CATCTGGACCGGTAGCCTTATTTGGTTTAATTCTTCTAAGCACTTTGGTTACCTCTCCCC  
CTTCAATTTTCATTGCATTAGATCAGGGCTGCCACACTTTTTCTTACCAAGGGCCAAA  
AATGAAACCTCACTGAAGGTAGTGGGCCGCAAGTAACTGTTGCTGTGTTATATTA
